# Supplementary material for: Synthesis of Biotinylated PAMAM G3 Dendrimers Substituted with R-Glycidol and Celecoxib/Simvastatin as Repurposed Drugs and Evaluation of Their Increased Additive Cytotoxicity for Cancer Cell Lines
Source: MDPI journal article supplement (doi:10.3390/cancers14030714), 2022-01-29
Supplement: s1 [file s1]

## SUPPLEMENTARY MATERIALS

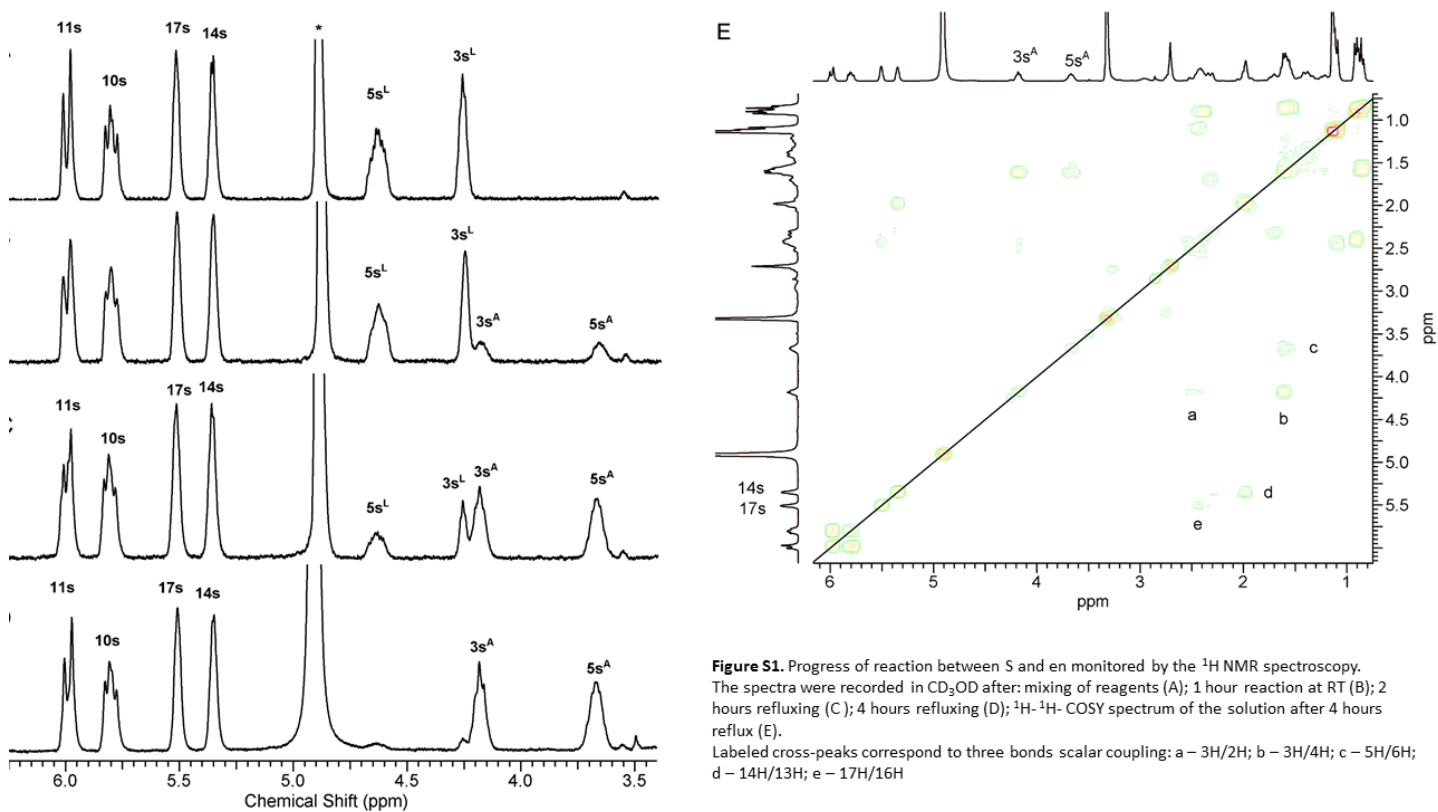

**Figure S1.** Progress of reaction between S and en monitored by the  $^1\text{H}$  NMR spectroscopy

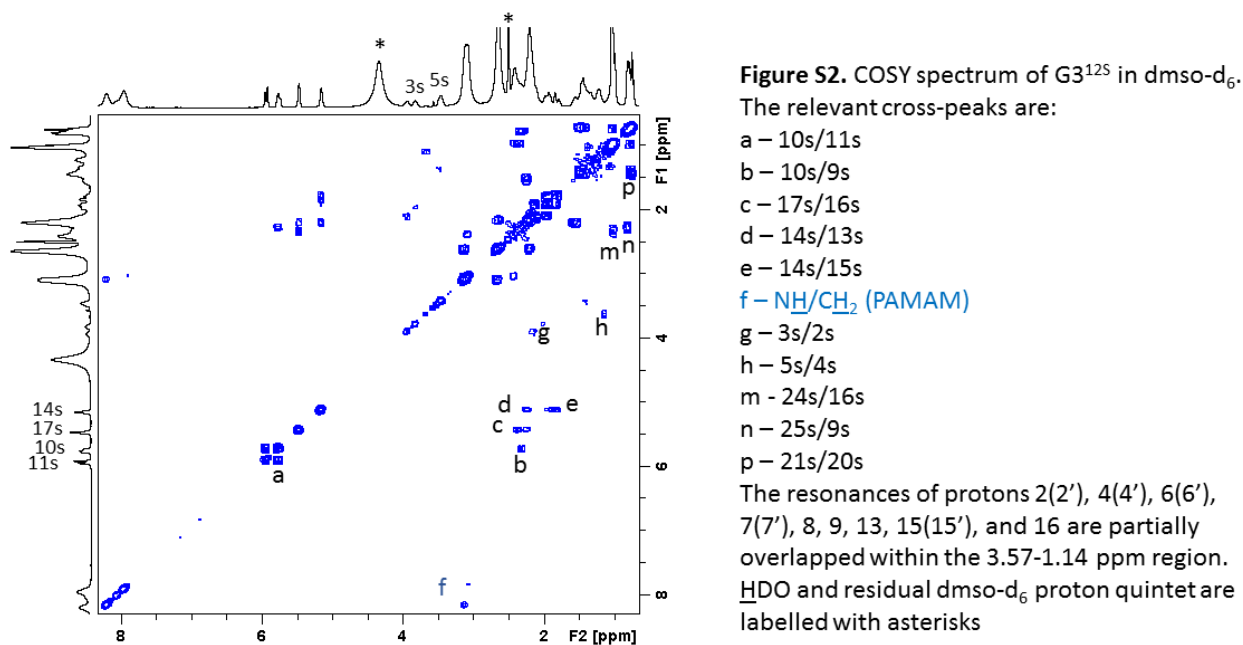

**Figure S2.** COSY spectrum of G312S in  $\text{DMSO-d}_6$

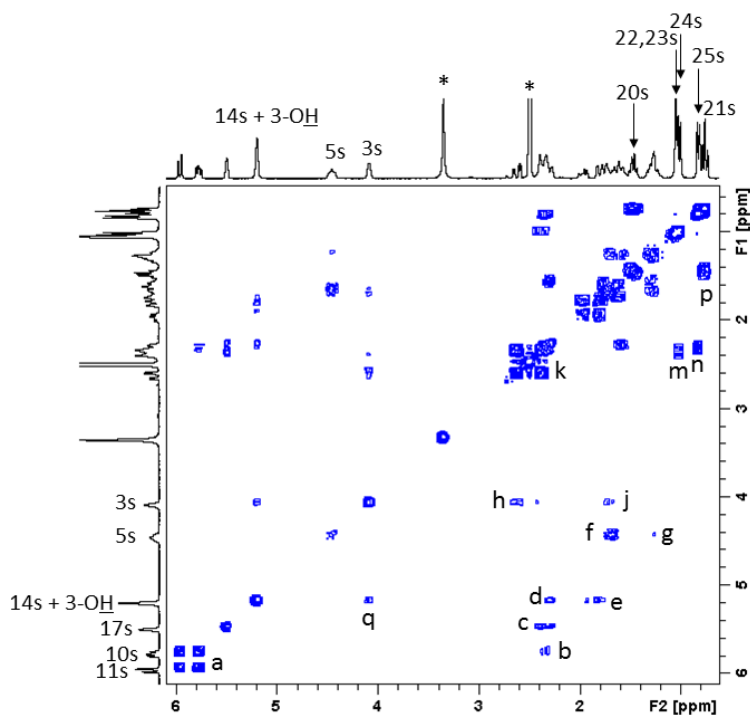

**Figure S3.** COSY spectrum of simvastatin in dmso.

The relevant cross-peaks are:

- a – 10s/11s
- b – 10s/9s
- c – 17s/16s
- d – 14s/13s
- e – 14s/15s
- f – 5s/4s
- g – 5s/6s
- h – 3s/2s
- j – 3s/4s
- k – 2s/2's
- m – 24s/16s
- n – 25s/9s
- p – 21s/20s
- q – 3s/3-OH

The resonances of protons 2(2'), 4(4'), 6(6'), 7(7'), 8, 9, 13, and 15(15') are overlapped within the 2.7-1.2 ppm region. HDO and residual dmso-d<sub>6</sub> proton quintet are labelled with asterisks

**Figure S3.** COSY spectrum of simvastatin in DMSO-d<sub>6</sub>.

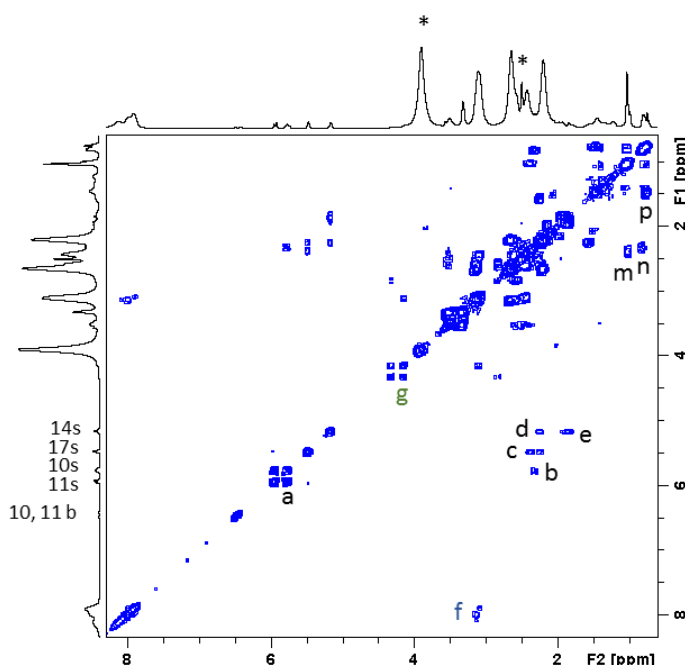

**COSY spectrum of G3<sup>2B4S14gl</sup> in dmso-d<sub>6</sub>.**

The relevant cross-peaks are:

- a – 10s/11s
- b – 10s/9s
- c – 17s/16s
- d – 14s/13s
- e – 14s/15s
- f – NH/CH<sub>2</sub> (PAMAM)
- g – 8b/9b (biotin residue)
- m – 24s/16s
- n – 25s/9s
- p – 21s/20s

The resonances of protons 2(2'), 3, 4(4'), 5, 6(6'), 7(7'), 8, 9, 13, 15(15'), and 16 are overlapped within the 3.57-1.14 ppm region. HDO and residual dmso-d<sub>6</sub> proton quintet are labelled with asterisks

**Figure S4.** COSY spectrum of G32B4S12gl in DMSO-d<sub>6</sub>.

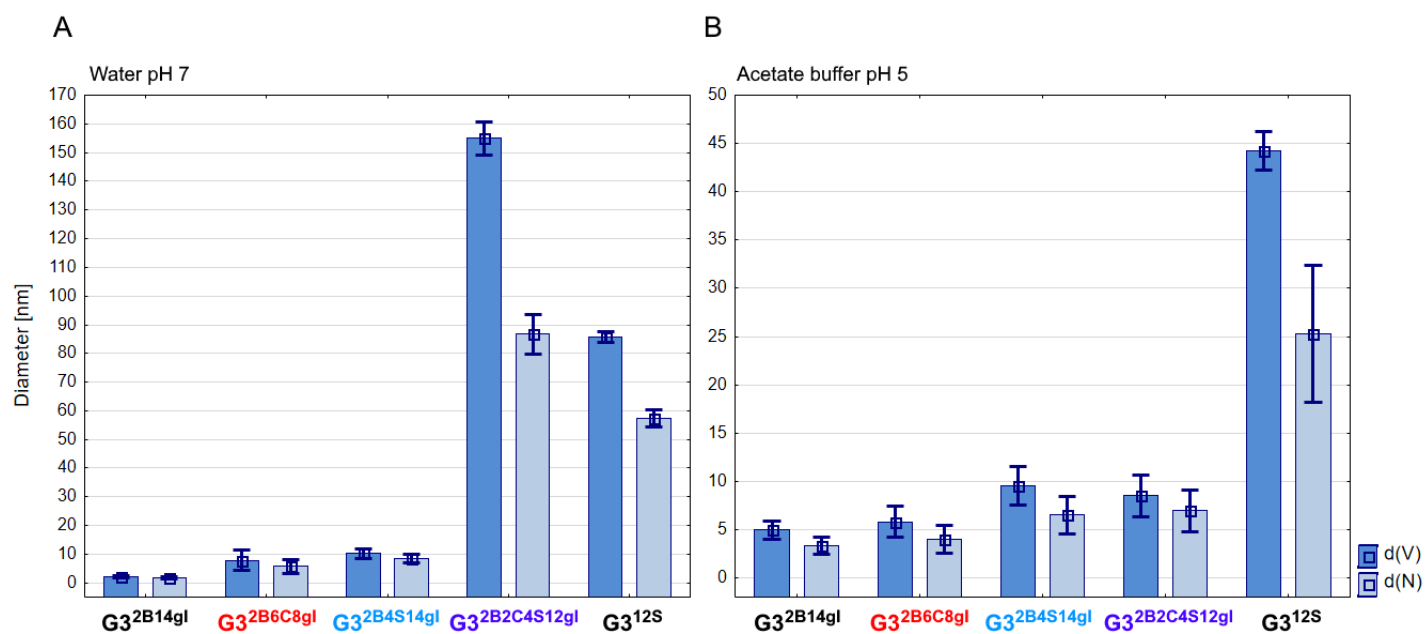

**Figure S5.** Size of conjugates by DLS.

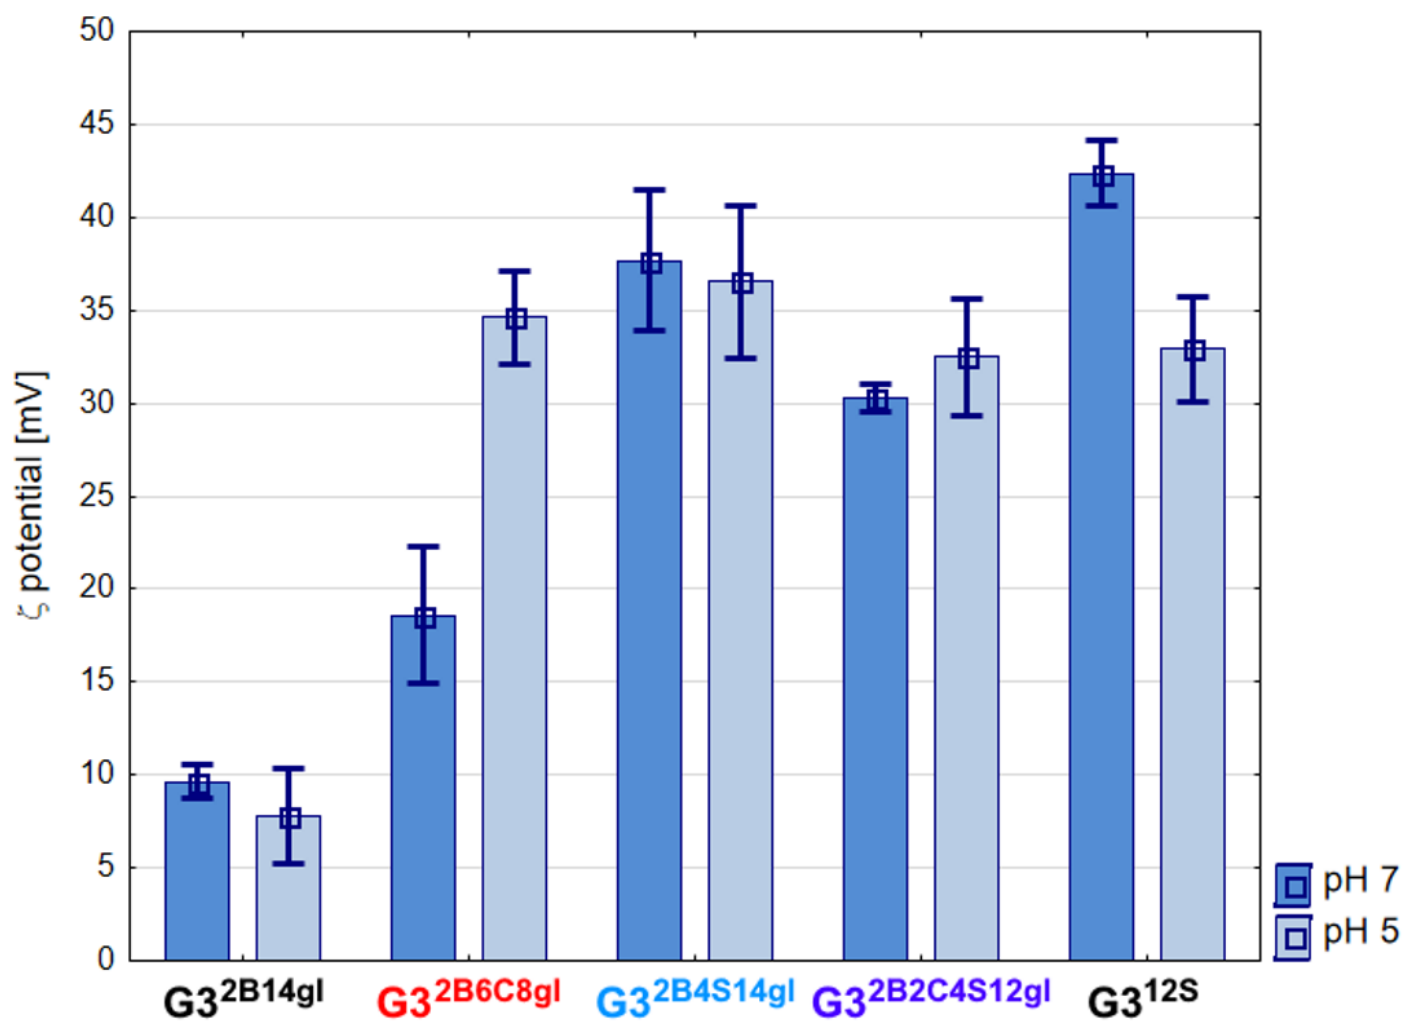

**Figure S6.** Zeta potential of conjugates.

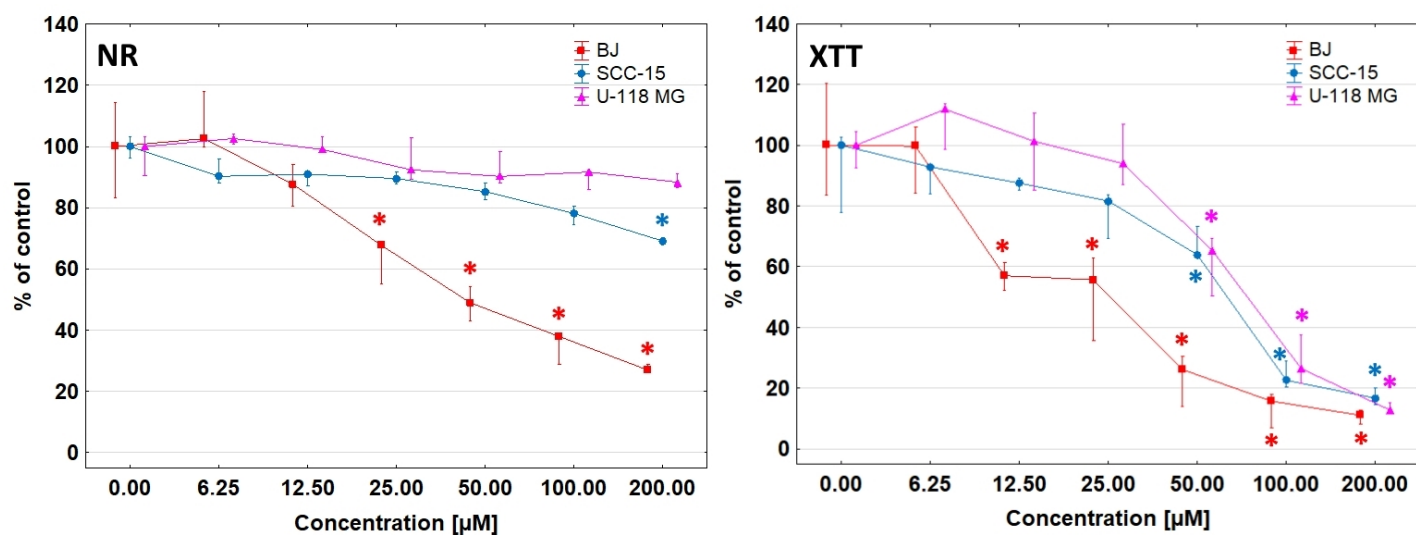

**Figure S7.** Cytotoxicity of G32B14gl carrier for BJ, SCC-15, and U-118 MG cells, Table S1: The  $^1\text{H}$  and  $^{13}\text{C}$  NMR chemical shifts of simvastatin (S), celecoxib (C), and G312S, G32B4S14gl, G32B2C4S12gl, and G32B6C8gl conjugates in DMSO- $d_6$

**Table S1**

The  $^1\text{H}$  and  $^{13}\text{C}$  NMR chemical shifts of simvastatin (S), celecoxib (C), and  $\text{G3}^{12\text{S}}$ ,  $\text{G3}^{2\text{B4S14gl}}$ ,  $\text{G3}^{2\text{B2C4S12gl}}$ , and  $\text{G3}^{2\text{B6C8gl}}$  conjugates in  $\text{DMSO-d}_6$ . The annotation nd means not detected due to limited concentration of the species or not assigned due to overlap with strong resonances from PAMAM carrier, which are not listed here (for spectral assignment of PAMAM and biotin resonances see [17]).

| Species→<br>Locant ↓ | S<br>$^{13}\text{C}$ | $^1\text{H}$ | $\text{G3}^{12\text{S}}$<br>$^{13}\text{C}$ | $^1\text{H}$ | $\text{G3}^{2\text{B4S14gl}}$<br>$^{13}\text{C}$ | $^1\text{H}$ | $\text{G3}^{2\text{B2C4S12gl}}$<br>$^{13}\text{C}$ | $^1\text{H}$ | $\text{G3}^{2\text{B6C8gl}}$<br>$^{13}\text{C}$ | $^1\text{H}$ | C<br>$^{13}\text{C}$ | $^1\text{H}$ |
|----------------------|----------------------|--------------|---------------------------------------------|--------------|--------------------------------------------------|--------------|----------------------------------------------------|--------------|-------------------------------------------------|--------------|----------------------|--------------|
| 1s                   | 170.65               | -            | 172.03<br>171.54                            | -            | 172.3                                            | -            | 171.96                                             | -            |                                                 |              |                      |              |
| 2s                   | 38.95                | 2.62         | 44.34                                       | 1.35         | 44.34,                                           | nd           | 45.01                                              | nd           |                                                 |              |                      |              |
|                      |                      | 2.37         | 44.51                                       |              | 44.51                                            |              |                                                    |              |                                                 |              |                      |              |
| 3s                   | 61.69                | 4.10         | 66.78                                       | 3.93         | 69.31                                            | nd           | 69.33                                              | nd           |                                                 |              |                      |              |
|                      |                      |              | 67.15                                       | 3.83         |                                                  |              |                                                    |              |                                                 |              |                      |              |
| 4s                   | 36.63                | 1.60         | 45.10                                       | 2.12         | 45.10,                                           | nd           | 45.01                                              | nd           |                                                 |              |                      |              |
|                      |                      | 1.54         | 44.97                                       | 1.97         | 44.97                                            |              |                                                    |              |                                                 |              |                      |              |
| 5s                   | 76.30                | 4.46         | 69.34                                       | 3.46         | 68.20                                            | nd           | 66.82                                              | nd           |                                                 |              |                      |              |
| 6s                   | 32.84                | 1.26         | 34.82                                       | 1.37         | 34.82                                            | nd           | 34.87                                              | nd           |                                                 |              |                      |              |
|                      |                      | 1.71         |                                             |              |                                                  |              |                                                    |              |                                                 |              |                      |              |
| 7s                   | 24.12                | 1.28         | 24.64                                       | nd           | 24.64                                            | nd           | 24.66                                              | nd           |                                                 |              |                      |              |
| 8s                   | 35.72                | 1.65         | 38.74                                       | nd           | 36.98                                            | nd           | 36.55                                              | nd           |                                                 |              |                      |              |
| 9s                   | 30.59                | 2.33         | 30.72                                       | nd           | 30.69                                            | nd           | 30.69                                              | nd           |                                                 |              |                      |              |
| 10s                  | 133.45               | 5.77         | 133.72                                      | 5.76         | 133.75                                           | 5.75         | 133.75                                             | 5.75         |                                                 |              |                      |              |
| 11s                  | 128.69               | 5.96         | 128.67                                      | 5.93         | 128.60                                           | 5.94         | 128.60                                             | 5.94         |                                                 |              |                      |              |
| 12s                  | 131.93               | -            | 132.16                                      | -            | 132.18                                           | -            | 132.18                                             | -            |                                                 |              |                      |              |
| 13s                  | 36.97                | 2.29         | 36.96                                       | nd           | 36.96                                            | nd           | 36.97                                              | nd           |                                                 |              |                      |              |
|                      |                      |              | 37.04                                       |              | 37.04                                            |              |                                                    |              |                                                 |              |                      |              |
| 14s                  | 68.03                | 5.20         | 68.12                                       | 5.15         | 68.17                                            | 5.16         | 68.13                                              | 5.15         |                                                 |              |                      |              |
| 15s                  | 32.47                | 1.84         | 32.47                                       | nd           | 32.47                                            | nd           | 32.38                                              | nd           |                                                 |              |                      |              |
|                      |                      | 1.92         |                                             |              |                                                  |              |                                                    |              |                                                 |              |                      |              |
| 16s                  | 27.15                | 2.39         | 27.15                                       | nd           | 27.20                                            | nd           | 27.20                                              | nd           |                                                 |              |                      |              |
| 17s                  | 129.61               | 5.50         | 129.36                                      | 5.47         | 129.40                                           | 5.47         | 129.35                                             | 5.46         |                                                 |              |                      |              |
| 18s                  | 177.05               | -            | 177.05                                      | -            | 177.03                                           | -            | 177.02                                             | -            |                                                 |              |                      |              |
| 19s                  | 42.85                | -            | 42.80                                       | -            | 42.80                                            | -            | 42.77                                              | -            |                                                 |              |                      |              |
| 20s                  | 32.93                | 1.47         | 32.99                                       | nd           | 32.97                                            | nd           | 33.03                                              | nd           |                                                 |              |                      |              |
| 21s                  | 9.60                 | 0.76         | 9.50                                        | 0.75         | 9.55                                             | 0.77         | 9.57                                               | 0.75         |                                                 |              |                      |              |
| 22s                  | 24.88                | 1.05         | 24.81                                       | 1.03         | 24.78                                            | 1.03         | 24.75                                              | 1.02         |                                                 |              |                      |              |
| 23s                  | 24.93                | 1.05         | 24.82                                       | 1.03         | 24.91                                            | 1.03         | 24.84                                              | 1.02         |                                                 |              |                      |              |
| 24s                  | 23.22                | 1.01         | 23.12                                       | 1.00         | 23.22                                            | 1.03         | 23.20                                              | 1.09         |                                                 |              |                      |              |
| 25s                  | 14.07                | 0.82         | 14.05                                       | 0.80         | 14.04                                            | 0.79         | 14.66                                              | 0.79         |                                                 |              |                      |              |
| 1g                   |                      |              |                                             |              | 52.86                                            | nd           | 55.81                                              | nd           | 55.92                                           | nd           |                      |              |
| 2g                   |                      |              |                                             |              | 70.72                                            | 3.50         | 70.79                                              | 3.48         | 61.61                                           | 3.40         |                      |              |
| 3g                   |                      |              |                                             |              | 64.98                                            | 3.31         | 64.99                                              | 3.31         | 59.62                                           | 3.25         |                      |              |
| 3c                   |                      |              |                                             |              |                                                  |              | nd                                                 | nd           | nd                                              | -            | 142.62(q)            | -            |
| 4c                   |                      |              |                                             |              |                                                  |              | nd                                                 | 7.16         | 111.39                                          | 7.15         | 106.66               | 7.20         |
| 5c                   |                      |              |                                             |              |                                                  |              | 125.20                                             | -            | 125.94                                          | -            | 125.92               | -            |
| 6c                   |                      |              |                                             |              |                                                  |              | 145.45                                             | -            | 147.13                                          | -            | 145.81               | -            |
| 7,11c                |                      |              |                                             |              |                                                  |              | 129.10                                             | 7.16         | 129.06                                          | 7.15         | 129.27               | 7.20         |
| 8,10c                |                      |              |                                             |              |                                                  |              | 129.80                                             | 7.16         | 129.80                                          | 7.15         | 129.89               | 7.20         |
| 9c                   |                      |              |                                             |              |                                                  |              | 139.39                                             | -            | 139.35                                          | -            | 139.65               | -            |
| 12c                  |                      |              |                                             |              |                                                  |              | 21.21                                              | 2.12         | 21.24                                           | 2.27         | 21.31                | 2.32         |
| 13c                  |                      |              |                                             |              |                                                  |              | 145.53                                             | -            | 145.46                                          | -            | 144.50               | -            |
| 14,18c               |                      |              |                                             |              |                                                  |              | 125.90                                             | 7.31         | 125.26                                          | 7.30         | 126.47               | 7.54         |
| 15,17c               |                      |              |                                             |              |                                                  |              | 128.15                                             | 7.75         | 128.13                                          | 7.73         | 127.30               | 7.87         |
| 16c                  |                      |              |                                             |              |                                                  |              | 140.18                                             | -            | 141.95                                          | -            | 141.58               | -            |
| 20c                  |                      |              |                                             |              |                                                  |              | 163.28                                             | -            | 163.28                                          | -            |                      |              |
| 21c                  |                      |              |                                             |              |                                                  |              | nd                                                 | nd           | nd                                              | nd           |                      |              |
| 22c                  |                      |              |                                             |              |                                                  |              | nd                                                 | nd           | nd                                              | nd           |                      |              |
| 23c                  |                      |              |                                             |              |                                                  |              | 172.83                                             | -            | 172.74                                          | -            |                      |              |
